## Remote measurement technologies for depression in young people: A realist review with meaningful lived experience involvement and recommendations for future research and practice

Annabel E L Walsh<sup>1</sup>, Georgia Naughton<sup>2\*</sup>, Thomas Sharpe<sup>2\*</sup>, Zuzanna Zajkowska<sup>1</sup>, Mantas Malys<sup>1</sup>, Alastair van Heerden<sup>3,4</sup>, Valeria Mondelli<sup>1,5</sup>

<sup>1</sup>Department of Psychological Medicine, Institute of Psychiatry, Psychology & Neuroscience, King's College London, UK

<sup>2</sup>Young People's Network, The McPin Foundation, UK

<sup>3</sup>Centre for Community-based Research, Human and Social Capabilities Department, Human Sciences Research Council, South Africa

<sup>4</sup>MRC/Wits Developmental Pathways for Health Research Unit, Department of Paediatrics, Faculty of Health Sciences, University of the Witwatersrand, South Africa

<sup>5</sup>NIHR Maudsley Biomedical Research Centre, South London and Maudsley NHS Foundation Trust and King's College London, UK

Corresponding Author: Annabel E L Walsh, Maurice Wohl Clinical Neuroscience Institute, 5 Cutcombe Road, Brixton, London, UK SE5 9RT, Email: [awalsh9890@gmail.com](mailto:awalsh9890@gmail.com); \*joint second authors.

### Abstract

**Background:** Remote measurement technologies (RMT), such as smartphones and wearables, allow data collection from an individual in real-time during their day-to-day life, from which their mood, physiology, behaviour, and environment can be inferred. As such, RMT could monitor and detect changes relevant to depression for objective screening, symptom management, relapse-prevention, and personalised interventions. Whilst RMT for depression in young people has been previously reviewed, technological capability and digital mental health literature steeply increase each year but with limited scrutiny of the realist and ethical considerations likely to impact the benefits, implementation, and overall potential of RMT in the real-world. **Methods:** A realist review of RMT for depression in young people aged 14 – 24 years was conducted in collaboration with two young, lived experience co-researchers from The McPin Foundation Young People's Network (YPN) and in accordance with the Realist and Meta-narrative Evidence Syntheses: Evolving Standards (RAMESES) for quality and publication. Iterative searches across 10 electronic databases and 7 sources of grey literature, fine-tuning of selection-criteria, data extraction and evidence synthesis with insights from the wider YPN members allowed gradual refinement of an initial framework into a realist intervention theory. **Results:** Of 6118 records identified, 104 were included in evidence synthesis. *What does and does not work?* Smartphones were most preferred, with both passive and active data collection for a holistic approach but a balance between data quality, intrusiveness, and data privacy. From the evidence currently available, depression was best detected by changes in sleep, mobility, smartphone use, social communication, and self- or parent-reported mood. This had some uses in screening, self-monitoring, and feedback to the healthcare professional but not in relapse-prevention and personalised interventions, where significantly more research is required. *How and why?* The impact of RMT as an intervention itself on depression outcomes remained unclear but self-monitoring and feedback improved emotional self-awareness, therapeutic relationship, and help-seeking behaviours. *For whom?* With limited standardisation and investigation of the impact of depression on

adherence rates, there may be an overestimation of how much young people are likely to use RMT in the real-world. However, they were most likely to benefit those interested in and motivated by the data-driven nature, who have lower depression severity, no co-morbidities where self-monitoring could cause harm, and the presence of changeable behaviours. *In what contexts?* RMT facilitated monitoring during transition to university, known to be associated with worsening depression in young people; however, there were significant challenges in health care and school settings. Adaptability was important, such that RMT were culturally compelling and accurate for the local context. Overall, there were many gaps in the evidence and common methodological issues across the literature.

**Conclusions:** From the evidence base and lived experience insights, realist and ethical considerations were highlighted, as well as the remaining gaps in evidence and methodological issues common across the literature. For RMT to be the scalable solution for depression in young people rather than a case of overplayed potential, several important recommendations for future research and practice were made.

**Keywords:** remote measurement technologies, depression, young people, adolescent depression, passive sensing, ecological momentary assessment, realist review, lived experience.

## Introduction

The use of digital technology is becoming increasingly common in mental health. Remote measurement technologies (RMT), such as smartphones and wearables, have been suggested as a solution to improve the monitoring, detection, and treatment of depression in young people across the globe. However, the benefits, implementation, and overall potential of RMT in the context of realist and ethical considerations remain unclear.

### The Burden of Depression in Young People & Low-resource Settings

Depression is now a leading contributor to the global burden of disease with significant impacts for the individual, society, and economy. It often begins in adolescence or young adulthood<sup>1,2</sup> reflecting a developmentally sensitive period and has a chronic course with recurrent depressive episodes throughout one's lifetime. However, diagnosis can be challenging with a lack of objective, reliable diagnostic criteria, and reliance on retrospective self-report influenced by both recall and mood-state associated biases<sup>3</sup>. Young people are particularly vulnerable to deterioration due to barriers in help-seeking, including delay in or lack of access to services, stigma, and difficulty identifying or expressing concerns<sup>4</sup>, often exacerbated by poor communication, disregard of agency<sup>5</sup>, and mismanagement<sup>6,7</sup>. As such, many cases go undetected and untreated, contributing to a trajectory towards full-blown, chronic depression associated with poorer outcomes in adulthood<sup>8</sup>. Indeed, it has been estimated that only 28% of all individuals with depression receive treatment, which decreases to just 7-14% in low- and middle-income countries (LMICs)<sup>9</sup> where almost 90% of the global adolescent population reside<sup>10</sup>. For those that do receive treatment, clinical improvement is modest at best<sup>11,12</sup> with little understanding of the active ingredients of effective interventions and why they may work for some but not others<sup>13-15</sup>. There is a

crucial need for effective early interventions targeting the adolescent period, that can be personalised and are scalable across different contexts if we are to improve depression outcomes across the globe <sup>16</sup>. Remote measurement technologies (RMT) may represent an increasingly ubiquitous and accessible resource for such an intervention.

### Remote Measurement Technologies

RMT include any digital technology with the capability to collect data from an individual in real-time during their day-to-day life through a remote interface, e.g., smartphones, wearables, and associated apps. Data collection can be active via direct input by the individual (e.g., ecological momentary assessment (EMA), mood logs) and / or passive via embedded sensors or during interaction with the device (e.g., heart rate, heart rate variation, skin conductance, actigraphy, accelerometry, global positioning system (GPS), ambient light, microphone, and paradata - screen status, app usage, call / SMS logs). Extracted data features are then used to infer the mood, physiology, behaviour, and environment of the individual (e.g., stressful events and responses, rest/activity cycles, sleep, mobility, physical and social activity, speech patterns) <sup>17,18</sup>, which may also be indicative of their mental state. In this way, RMT could be used for real-time monitoring and detection of changes relevant to depression, contributing to more objective screening, improved symptom management, relapse-prevention, and delivery of just-in-time adaptive interventions. Initial work is promising, with evidence that RMT data features can distinguish those with depression from healthy controls and are associated with and predictive of standardised measures of depression symptom severity <sup>19-21</sup>. However, depression itself, characterised by low motivation and energy, may make it more difficult to engage with RMT due to the requirement for daily interaction over long periods of time <sup>22,23</sup>, and even less is known about the use of RMT for depression specifically in young people <sup>24</sup>. Whilst narrative, systematic, and scoping reviews have previously been conducted <sup>25-29</sup>, interest in the field, technological capabilities, and number of records available for inclusion increase steeply each year especially in the wake of the Covid-19 pandemic, with most digital mental health literature published between 2019 and 2022 (PubMed.gov). Despite this, regulation and standardisation remain inadequate, with few clinical trials on effectiveness or unintended outcomes and low continued engagement <sup>30-33</sup>, as well as limited scrutiny of the realist and ethical considerations likely to significantly impact the benefits, implementation, and overall potential of RMT in the real-world. With pressure to find a scalable solution for the global mental health crisis and the movement further towards digital mental health, there is an ever-increasing danger that use of RMT may surge ahead of the evidence base <sup>34</sup>. Therefore, the aim of this study was to conduct a realist review with lived experience involvement to determine the ways, for whom, in which contexts, and why RMT appear to work or not work for depression in young people aged 14 – 24 years and make recommendations for future research and practice.

## Methods

### Rationale for the Realist & Lived Experience Involvement Approach

Whilst traditional methods of review focus on determining the overall effectiveness of an intervention, a realist review seeks to determine the ways in which an intervention does or doesn't work, when used by different individuals, in different contexts, and why, then make recommendations for how the intervention can be implemented and used most effectively<sup>35</sup>. It is an iterative process encouraging consultation with key stakeholders throughout<sup>35</sup>, who by virtue of their lived experience bring a wealth of additional expertise, knowledge, and insights important for real-world impact<sup>36</sup>. In the present study, the realist review was conducted in collaboration with two young, lived experience co-researchers from The McPin Foundation Young People's Network (YPN) and in accordance with the Realist and Meta-narrative Evidence Syntheses: Evolving Standards (RAMESES) for quality and publication<sup>37</sup>. Consultations were also held with the wider YPN to clarify scope, aid evidence synthesis, and develop the recommendations.

### Clarifying Scope & Search Processes

Through exploratory searches using broad search terms and selection criteria, snowball sampling, discussion with the YPN and co-researchers, and progressive focusing of scope, a final list of relevant intervention theories was produced. These were then categorised to form a theoretically based evaluative framework to be populated with evidence. The framework also formed the basis of the search strategy and bespoke data extraction template, with inputs from the co-researchers on sources of literature, search terms, refinement of selection criteria and data to be extracted. Searches were conducted across 10 electronic databases, including those with a more specialist focus on health technology (PubMed, Ovid – EMBASE, MEDLINE, PsychINFO and Global Health, Web of Science, Cochrane Library, IEEE Xplore, HTA database, ACM digital library) and 7 sources of grey literature (CADTH, NICE, WHO, ClinicalTrials.gov, ISRCTN registry, Gov.uk, rxiv.org), with a date restriction of Jan 1990 – current day (Aug 2021) reflecting the digital revolution. Search terms related to RMT, depression, young people, and the specific intervention theories included in the framework. Hand searches of reference lists of eligible literature and relevant systematic reviews were also conducted.

### Literature Selection Criteria & Appraisal

Following iterative searches and refinement, the final inclusion criteria were as follows: (i) peer-reviewed articles and grey literature; (ii) of any type including reviews, protocols, quantitative, qualitative and mixed-methods original research, and clinical trials displaying sufficient rigor and relevance; (iii) that assessed the use of RMT; (iv) for depression as the primary condition but other mental and physical comorbidities could be present; (v) specifically in young people aged 14 – 24 years old as defined by the World Health

Organisation and United Nations<sup>38,39</sup>, unless the sample was considering end-users of RMT involved in the care of young people (e.g., health care professionals, parents); (vi) from both clinical and community populations allowing inclusion of at-risk, sub-clinical young people who could deteriorate during the monitoring period. Literature where RMT was used solely to deliver an intervention without any remote measurement, focused on a specific type of depression (e.g., bipolar, perinatal, or postnatal), or did not include a standardized measure of depression (e.g., well-being scales) was excluded.

### Data Extraction & Evidence Synthesis

The bespoke data extraction template comprised a new row for each included literature record that may be relevant to several intervention theories, and columns for the input of extracted data relating to each intervention theory. Records were categorised and sorted by intervention theory then divided between the team lead (AW), co-researchers (GN, TS) based on their areas of interest, and two postdoctoral researchers (ZZ, MM) for data extraction. Initial evidence synthesis was undertaken by the team lead, with inferences then discussed with the YPN to ensure external validity against the lived experience of young people, and final review by the co-researchers to ensure perspectives were interpreted correctly without researcher bias. Where further testing and refinement of intervention theories was required, these literature search, selection, appraisal, extraction, and synthesis processes were repeated. In this way, the initial framework was gradually focused into a refined, realist intervention theory comprising multiple context-mechanism-outcome (CMO) configurations describing the ways, for whom, in which contexts, and why RMT appear to work or not work for depression in young people.

## Results

### Literature Inclusion & Characteristics

Of 6118 records identified, 104 were included in the final evidence synthesis (Fig. 1). Most investigated whether RMT data features could act as a proxy for depression symptom severity in young people ( $n = 36$ ) and the acceptability and feasibility of doing so ( $n = 35$ ). Data privacy ethics ( $n = 6$ ) or possible unintended outcomes ( $n = 3$ ) of real-time monitoring were severely under investigated given the growth of the field. Only 6 records originated from LMICs (Nepal, Columbia, Bangladesh, and Indonesia), and eligible grey literature was limited ( $n = 5$ ), reflecting the current lack of regulation and government policy on the use of RMT for depression in young people.

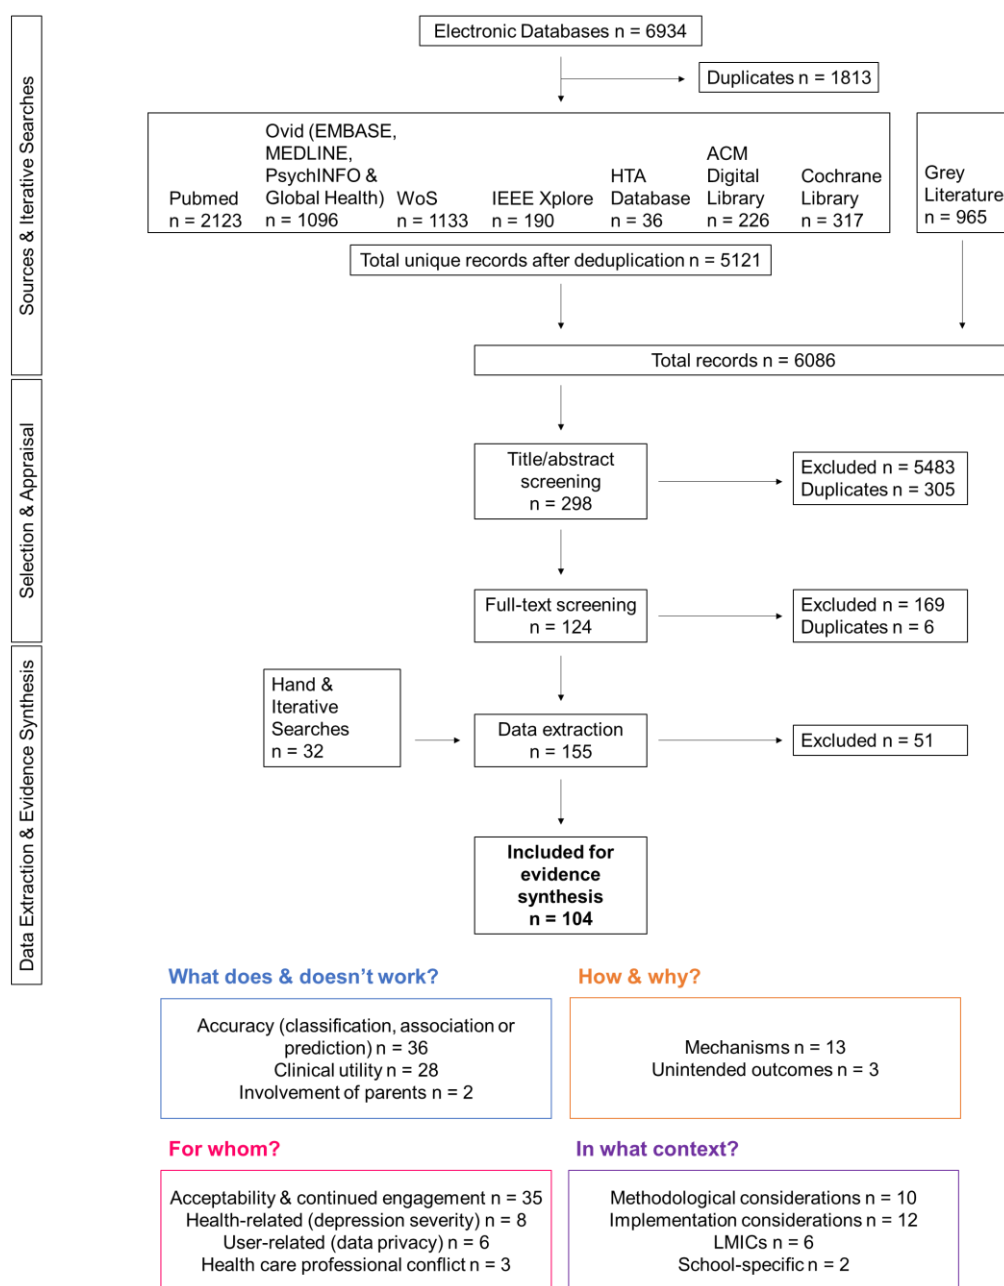

**Fig. 1.** Flow diagram of searches, literature selection and grouping, data extraction and evidence synthesis.

### What does and does not work?

Out of the different types of RMT, smartphones and associated apps were the most prevalent in the literature (n = 52; internet-based platforms n = 23; wearables only n = 2; electronic diary n = 1; use in combination n = 22), as well as the most preferred by young people in the literature and during consultations, due to their ubiquity over other RMT<sup>29,40</sup>. However, the choice of RMT<sup>41</sup> and type of smartphone operating system used (i.e., Android or iPhone)<sup>42</sup> were found to influence the specific data features identified, as well as overall accuracy as a proxy for depression symptom severity.

Regarding data collection, the continuous, unobtrusive nature of passive monitoring increased data quality and accuracy<sup>41</sup>; however, this still required the young person to remember to keep the device charged and on their person every day for extended periods, with no technological issues (e.g., software crashes, GPS / Wi-Fi / Bluetooth dropout, drain on battery and data allowances)<sup>29,43</sup>. As such, passive monitoring may be associated with overall lower adherence and greater decline in use over time compared with active monitoring<sup>43</sup>.

Conversely, adherence to active monitoring required consideration of sampling frequency, but with conflicting evidence as to whether fewer or more EMA prompts was associated with greater adherence in young people with depression. Whilst a meta-analysis found an association between more prompts per day and higher adherence in clinical samples<sup>44</sup>, prompt fatigue at the daily level was common across studies, with more robust engagement obtained in studies employing weekly or biweekly EMA protocols<sup>45,46</sup>. It may be that the timing and content of prompts is more important than frequency, with the suggestion of smart prompts triggered when an individual is more likely to be receptive and able to respond<sup>47</sup>, allowing convergence of prompt, motivation, and ability as the three elements required for a behaviour to occur<sup>48,49</sup>. Provision of incentives, personalised feedback and gamification were also mentioned as ways to encourage continued engagement<sup>50</sup>.

YPN members expressed that both types of data collection should be used in combination for a holistic approach, with passive monitoring to increase accuracy, active monitoring to provide context, and interactions kept brief but relevant / personalised and motivational in nature, and of an appropriate frequency and timing to balance accuracy and intrusiveness. Young people in the literature and during consultations also expressed increasing concern regarding the privacy, confidentiality, and ethical implications of the collection and sharing of digital data. Young people were much less likely to share digital data than psychosocial or biological data<sup>51</sup>, with acceptability of certain digital data types particularly low e.g., audio, keystroke, social media, app usage and location data<sup>51,52</sup>. They stressed the importance of transparent, informed consent and the need for user-control over what data is shared, how much, who with, and when<sup>53-55</sup>. This would also allow the option to submit notes alongside for added context to avoid misinterpretation of the data or misrepresentation of the young person; however, one mentioned the risk of purposeful skewing of the data to reduce concern e.g., in comorbid eating disorder.

Once collected, RMT data features were able to distinguish those with depression from healthy controls and were associated with and predictive of standardised measures of depression symptom severity, with changes in sleep, mobility, smartphone use, social communication and EMA responses appearing to be the most promising for the detection of depression in young people.

### *Sleep*

A case-control study found young people with depression had significantly longer sleep latency, higher restlessness, shorter sleep duration and reduced sleep efficiency compared to with healthy controls, with a positive correlation between sleep latency and negative affect the following day <sup>56</sup>. Conversely, remitted depressed had significantly longer sleep duration on work-free days compared with healthy controls <sup>57</sup> showing the importance of also collecting contextual data, but also that sleep disruption may be a persistent factor in depression that would be sensible to monitor in relapse-prevention. There was also conflicting evidence for the association between sleep duration and later depression symptom severity across longitudinal studies: one study found no significant correlation <sup>58</sup>, one found a negative correlation <sup>59</sup>; one found longer sleep duration at baseline but shorter sleep duration at follow-up associated with worse change in depression symptoms <sup>60</sup>; one found longer sleep duration to predict greater anhedonia the following day, but when averaged across 2 weeks shorter sleep duration was predictive of greater anhedonia, reflecting the differential effects of acute versus chronic sleep deprivation in depression <sup>61</sup>; however, for those still of school-age, longer sleep duration was associated with better sleep quality and predictive of lower depression symptom severity the following day, mediated by higher daytime energy level and moderated by parental enforcement of bedtimes and later school start times <sup>62,63</sup>. Instead, greater variation in the sleep time series data was consistently found to be associated with greater depressive symptom severity [53–55]. This suggests that an overall irregular sleep pattern rather than any single discreet measure of sleep may be more indicative of worsening depression, especially in young people subject to changing demands and academic pressures <sup>60</sup>.

### *Mobility*

Reduced mobility was also consistently found to be associated with greater depressive symptom severity in young people across a variety of different measures including step count <sup>64</sup>, Bluetooth co-locations <sup>59</sup>, GPS <sup>60</sup> and accelerometry <sup>58,66</sup>. No measure was predictive of later depression symptom severity at 2-year follow-up; however, this was likely the result of using a 21-day snapshot of RMT data rather than continuous monitoring for the whole 2 years <sup>64</sup>. Indeed, again, greater variation and lower predictability in daily activity duration time series data was associated with depression symptom severity only in those participating for more than 45 days, with functioning routines becoming less stable over time as depression worsens <sup>67</sup>.

### *Smartphone Use & Social Communication*

Changes in patterns of smartphone use and social communication could be used to infer the reduced concentration, negative cognitive biases, and initial reassurance seeking <sup>68</sup> then subsequent social withdrawal observed in depression. Indeed, young people with depression were found to display significantly higher smartphone use specifically in study spaces <sup>58</sup>,



frequency of launch per app<sup>69</sup>, use of social communication apps<sup>52,69</sup>, and daily proportion of negative words typed within social communication apps<sup>70,71</sup> compared with healthy controls. Lower time spent in friends' houses per visit<sup>66</sup> and reduced face-to-face conversation frequency and duration<sup>59</sup> were predictive of later depression symptom severity. Finally, as would be expected, EMA self-reported negative mood<sup>50,65</sup>, as well as stress<sup>59,68</sup>, self-esteem [61] and parent-reported negative mood<sup>73</sup> were found to be associated with and predictive of greater depression symptom severity.

RMT data features have been considered in isolation so far; however, their combination in linear regression and machine learning models increased predictive performance, with classification accuracy for standardised measures of depression ranging from 77 – 86%<sup>42,58,73–75</sup>. Further improvements were obtained through contextual filtering of RMT data features (e.g., weekday / weekend sleep, daytime / evening conversation frequency)<sup>76</sup>, normalisation relative to an individual's own data<sup>77</sup>, and inclusion of parent-report EMA responses<sup>47,73</sup>.

### *Clinical Utility*

Whilst RMT data features certainly appear relevant to depression, there is less evidence for the clinical utility of this in improving depression outcomes in young people either through objective screening, symptom management, relapse-prevention, or just-in-time adaptive interventions. Of the 28 records pertaining to clinical utility only 10 were published studies, with the remaining 18 being registries and/or protocols of clinical trials yet to be completed<sup>78–96</sup>.

Three studies investigated the use of RMT for one-off, opportunistic screening in young people. Comparison of RMT with face-to-face assessments of depression found fair to good concordance for the detection of positive screens of depression<sup>40,97–100</sup>, as well as the detection of more psychosocial risk factors overall<sup>97,99</sup>. This suggested increased disclosure of information without fear of judgement, which may aid quicker provision of more appropriate treatment.

The use of RMT for symptom management through self-monitoring and feedback to health care professionals was often rated as useful by young people<sup>101,102</sup> and resulted in some reduction of depression symptom severity<sup>103,104</sup>. However, this reduction was not significantly different between self-monitoring and comparison groups<sup>46,103–111</sup>, unless outliers were removed<sup>46</sup>, or history of emotional abuse was considered<sup>112</sup>. As such, RMT could aid symptom management in less severe cases but may not be sufficient for those with higher depression symptom severity and/or adverse childhood experiences<sup>46</sup>.

Many highlighted the promise of RMT for relapse-prevention through detection of a “relapse-signature” and direct linkage to primary or secondary alert-based systems. RMT could even

inform and directly deliver personalised digital micro-interventions that are highly focused towards the detected change requiring lower effort for purposeful engagement <sup>113</sup>, or just-in-time adaptative interventions that adapt the provision of support to an individual's changing state over time, such that the right type of support is delivered, at the right time, just when the individual needs it most <sup>74,75,114</sup>. This would require understanding of which RMT data features precede relapse, their specificity for depression, their sensitivity in those already depressed, and the impact of detection on time to treat and depression outcomes, for which literature was limited, at least in young people. However, there were some small proof of concept studies for the prediction of day-to-day <sup>75</sup>, or even hour-to-hour <sup>74</sup> fluctuations in depression symptom severity in clinical samples, leading to quick modification of care for the two patients detected and alerted as at risk <sup>45</sup>, as well as several clinical trials underway <sup>86,87,93,94</sup>.

### How and why?

Whilst the overall impact of RMT on depression outcomes in young people remained inconclusive, self-monitoring specifically was consistently found to result in a greater increase in emotional self-awareness relative to comparison groups <sup>7,102,104,106,107,115</sup>. Emotional self-awareness describes the ability to understand one's own emotions and is often low in those with depression <sup>116</sup>; however, it can be increased through improved understanding of the links between certain events or thoughts and later emotions, behaviours, and coping strategies. Indeed, this is a key component of cognitive behavioural therapy and forms the basis of many smartphone apps with EMA prompt protocols <sup>103,115,116</sup>. Increased emotional self-awareness can lead to improvements in other important emotional processes, such as emotional granularity, controllability, and self-regulation <sup>117,118</sup>, that may contribute to long-term behaviour change, more appropriate coping strategies and subsequent improvement in depression outcomes. Contrary to the concerns of healthcare professionals <sup>119</sup>, self-monitoring was also found to increase readiness for and occurrence of help-seeking behaviours. In boys specifically, RMT were found to be an alternative outlet for expressing emotion, acting to reduce the stigma they felt they would receive if they talked about their emotions until they were ready to seek help <sup>105</sup>.

Where there was feedback to the health care professional, RMT facilitated quicker and more efficient communication <sup>120</sup>, prompted recall or the start of a conversations <sup>115</sup> with greater disclosure of information <sup>98</sup>, increased understanding of the young person <sup>108</sup>, allowed shared decision making, goal setting and tracking <sup>7,45,101,118,121</sup>, and led to an overall increase in therapeutic engagement, alliance, and adherence <sup>80,115</sup>. Finally, although limited, there was some evidence to suggest that use of RMT for depression in young people may have some unintended outcomes, such as worry in the absence of safeguarding when viewing pertinent data or occurrence of false negatives and/or positives <sup>40,52,122</sup>; overreliance and

overcontrol, particularly in those with co-morbid health anxiety, eating disorder or obsessive-compulsive disorder where self-monitoring could cause significant harm<sup>123</sup>; burden of the data-driven nature, goal setting and behaviour change, and a sense of failure when not achieved<sup>124</sup>, all of which could exacerbate depression symptoms. As such, through consideration of the underlying mechanisms of what does and does not work, RMT may be better used alongside current care pathways or to monitor and/or augment the effects of other interventions for depression in young people, rather than as an intervention itself. However, the question remains as to why adherence, accuracy, predictive performance and/or effectiveness may vary across young people and different contexts.

### For whom?

Throughout the literature, there was the assumption that RMT may be a natural fit for young people who have grown up during the digital revolution. Internet access and smartphone ownership in young people were relatively high and perspectives on the use of RMT for depression were generally positive<sup>43,52,101,102,106,110,120,122,125–128</sup>. However, usage statistics were quite low<sup>126,129,130</sup>, particularly for boys<sup>126,130</sup> despite the benefit they may gain from RMT through reduced perceived stigma and subsequent help-seeking behaviours<sup>105</sup>. YPN members indicated that the low motivation and energy experienced during depression but requirement for daily interaction over extended periods of time played a significant part in their decision not to use RMT<sup>22,23,131</sup>. Whilst no study specifically set out to investigate the impact of depression itself on the use of RMT and adherence rates as their main aim, it was still considered by some in related analyses, but with conflicting results. Five studies reported no significant effect of depression symptom severity on drop out [95,101], EMA prompt response rates<sup>44</sup>, amount of entries / missing data<sup>67</sup> or exclusion due to missing data<sup>76</sup>. Two studies suggested that those with greater depression symptom severity may be less likely to drop out<sup>47</sup>, with continued engagement beyond the minimum time required by the study<sup>115</sup>. Only 1 study found greater depression symptom severity, as well as treatment intensity, to be related to lower use of their smartphone app<sup>101</sup>. Even though the lowest adherence rates reported were comparable to those of other interventions<sup>46,110,115</sup>, it is important to note the impact of the heterogeneous, artificially inflated, or unreported quantitative measures of feasibility on the validity of adherence rates across the literature. With evidence that the level of adherence may be predictive of mental health outcomes at least in adults<sup>132</sup>, there is a crucial need for standardisation to determine whether young people are likely to use RMT for depression, whether this translates to real-world settings outside of the study contexts and further investigate reasons why it may vary across individuals.

### In which contexts?

RMT were also assumed to be an increasingly ubiquitous and accessible resource that could be the much-needed scalable solution to the global mental health crisis. Whilst there was evidence that digital divides have declined in recent years, they were still pertinent, particularly in rural areas, LMICs and/or areas with higher accessibility but low digital literacy<sup>133,134</sup>. As such, the widespread adoption of RMT could further perpetuate mental health inequalities and outcomes<sup>135</sup>. Additionally, with high initial costs in the development and implementation of RMT, LMICs sometimes resort to making use of previously established RMT that may not be suitable for the context<sup>40</sup>. Six studies investigated the use of RMT for depression in young people in LMICs, with a focus on adaptability to context, language, and culture key to their success<sup>40,100,134,136–138</sup>. The factors found to influence the type of data that should be collected, and outcome measures included to make RMT more culturally compelling and accurate in local contexts were consideration of the role of families, locally defined experience of depression, and social determinants of mental health<sup>40,137,139,140</sup>.

There were attempts to assess the feasibility of integrating RMT into primary and secondary mental health care services; however, differing digital infrastructures and capacities made the process complicated<sup>141,142</sup>, uptake by consenting healthcare professionals was low (35/103, 34%) due to the changes in roles, responsibilities and training required<sup>107,115,143</sup>, and there was a need to balance the expectations of young people, healthcare professionals and researchers regarding alert-based systems and capacity to respond<sup>7,40,101,111,115,119,122,128,143</sup>. Whilst RMT could still be used to enhance the therapeutic relationship, its intended use in the early detection of deterioration for relapse-prevention is unfortunately highly unlikely to result in quicker time to treat under current resourcing and capacity levels.

Finally, the young lived experience co-researchers highlighted the potential challenges associated with real-time monitoring in schools, where young people may not always be able to keep RMT on their person since the use of smartphones and other technologies is often not allowed during class. There were two studies investigating the use of RMT in schools<sup>144,145</sup>, with only 1 including school personnel<sup>144</sup>, whose positive perspectives were likely the result of participation bias. Some studies were able to adapt data collection methods for the school context, such as fixed-time sampling with EMA prompts only occurring outside of school time; however, data was still missed that may be crucial to understanding the role of academic stressors in depression. Further investigation of acceptability and feasibility in a greater number of schools across different regions is required, with potential to integrate RMT alert-based systems into schools instead where there is somewhat more of a capacity for early detection and relapse-prevention<sup>145</sup>. Overall, there is a need for increased

implementation science to determine whether the significant challenges above can be overcome for the sustainable integration and scaling of RMT across contexts<sup>146</sup>.

### Realist Intervention Theory of RMT for Depression in Young People

Evidence synthesis allowed gradual refinement of the initial framework into a realist intervention theory of the ways, for whom, in which contexts, how and why RMT appear to work or not work for depression in young people aged 14 – 24 years, as shown in Fig.2

**Fig. 2** – Realist intervention theory of RMT for depression in young people and explanation of the patterns observed. Question marks indicate areas where evidence is lacking and there is a need for further research.

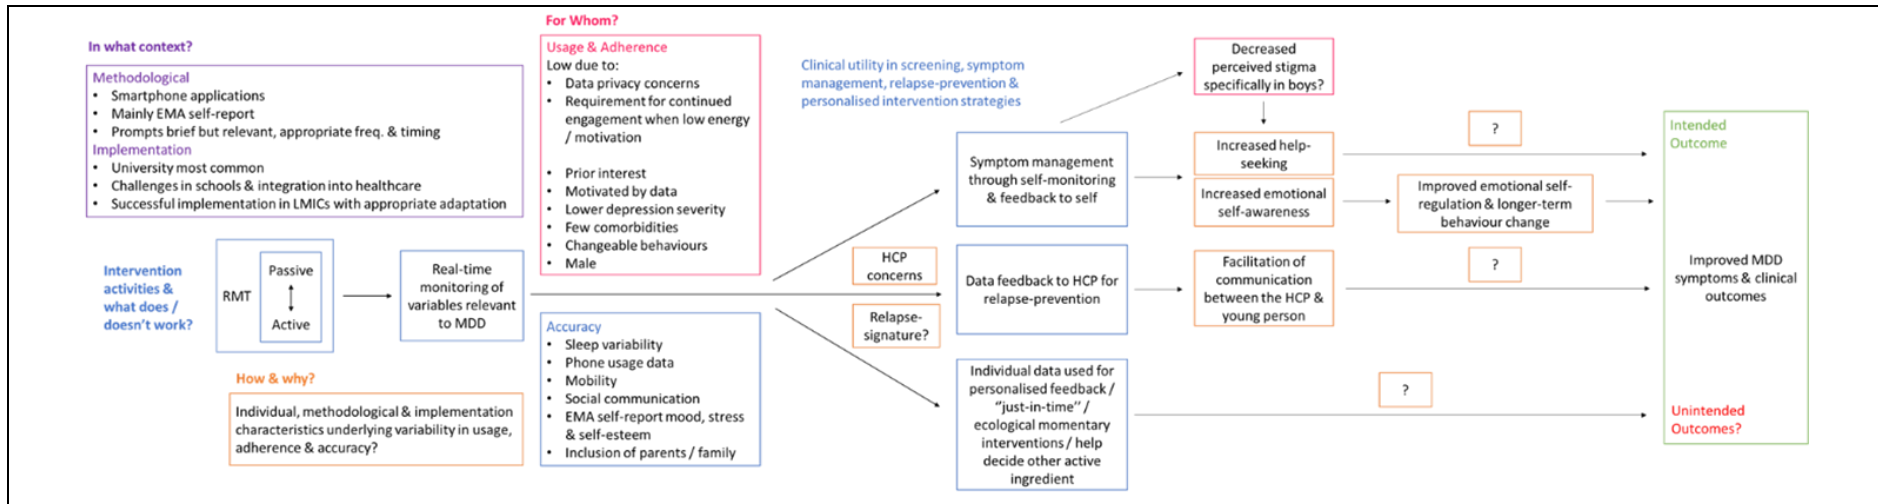

|                                             |                                                                                                                                                                                                                                                                                                                                                                                                                                                                                                                                                                                                                                             |
|---------------------------------------------|---------------------------------------------------------------------------------------------------------------------------------------------------------------------------------------------------------------------------------------------------------------------------------------------------------------------------------------------------------------------------------------------------------------------------------------------------------------------------------------------------------------------------------------------------------------------------------------------------------------------------------------------|
| <p><b>What does &amp; doesn't work?</b></p> | <ul style="list-style-type: none"> <li>• Preference for smartphones &amp; apps.</li> <li>• Passive &amp; active monitoring, with a balance between data quality &amp; intrusiveness.</li> <li>• Greater consideration of the privacy, confidentiality &amp; ethical implications of collecting &amp; sharing digital data needed.</li> <li>• Depression best detected by increased sleep variability &amp; changes in mobility, smartphone use, social communication &amp; self- / parent-report EMA responses.</li> <li>• Clinical utility in screening, self-monitoring, &amp; feedback to the healthcare professional.</li> </ul>        |
| <p><b>How &amp; why?</b></p>                | <ul style="list-style-type: none"> <li>• Impact of RMT on depression outcomes unclear.</li> <li>• Self-monitoring &amp; feedback to healthcare professional: <ul style="list-style-type: none"> <li>• Increased emotional self-awareness.</li> <li>• Enhanced therapeutic relationship.</li> <li>• Encouraged help-seeking behaviour particularly in boys via reduced perceived stigma.</li> </ul> </li> </ul>                                                                                                                                                                                                                              |
| <p><b>For whom?</b></p>                     | <ul style="list-style-type: none"> <li>• Potential overestimation of how much young people are likely to use RMT in real-world settings.</li> <li>• Characteristics of those most likely to benefit from RMT for depression include: <ul style="list-style-type: none"> <li>• Interested in &amp; motivated by the data-driven nature of RMT.</li> <li>• Lower depression severity.</li> <li>• No co-morbidities where self-monitoring could cause harm.</li> <li>• Presence of specific behaviours or coping strategies that could be targeted to help improve depressive symptoms.</li> </ul> </li> </ul>                                 |
| <p><b>In which contexts?</b></p>            | <ul style="list-style-type: none"> <li>• Monitoring during transition to university, known to be associated with worsening depression.</li> <li>• Significant challenges with the integration of alert-based systems into primary &amp; secondary healthcare likely to limit the potential of RMT in relapse-prevention.</li> <li>• Schools may not allow RMT during class where a significant proportion of a young person's time is spent but important data missed.</li> <li>• Potential perpetuation of mental health inequalities without consideration digital divides and adaptability to context, language, and culture.</li> </ul> |

## Discussion & Recommendations

There has been a significant movement towards digital mental health in recent years, with the potential for RMT to be the scalable solution to the global mental health crisis<sup>34</sup>. However, in the wake of this steep growth, regulation and standardisation remain inadequate, with limited understanding of the effect on depression outcomes nor scrutiny of the realist and ethical considerations likely to significantly impact the benefits, implementation, and overall potential of RMT in the real-world<sup>30–33</sup>. Therefore, a realist review was conducted in collaboration with The McPin Foundation YPN through which a refined, realist intervention theory was successfully produced explaining the ways, for whom, in which contexts, how and why RMT appear to work or not work for depression in young people aged 14 – 24 years.

It also highlighted gaps where very limited evidence was available, as well as several common issues that appeared across much of the literature reviewed including: convenience sampling and selection bias with those young people more interested in RMT more likely to take part; reliance on self-report in community samples with few reporting the number above / below clinical cut-offs; potentially inappropriate statistical analyses for the low sample sizes but large time series data sets<sup>147</sup>; short study duration (7 days to 12 months at most) or snapshot monitoring periods (2 – 3 weeks) in multiyear studies despite estimated relapse rates to be only 5% within the first 6 months, 12% by 12 months, 40% by 2 years, then 70% by 5 years<sup>148–150</sup>; low number of predictor variables and little consideration of the many factors that could have confounding, mediating or moderating effects over the length of the monitoring period; potentially conflicting indicators of depression symptom severity due to the diversity of experience overlooked<sup>76,77,122</sup>; heterogeneity, artificial inflation, or non-report of quantitative measures of feasibility making comparison across studies difficult, especially with regards to adherence<sup>27,44</sup>; limited investigation of specificity, sensitivity, and impact on time to treat and depression outcomes; and overall little attempt to assess and explain variability in adherence, accuracy and predictive performance across individuals<sup>74</sup>. With the evidence base as it stands and important insights from those with lived experience, we make the following recommendations for the use of RMT for depression in young people:

**Recommendations for future research:** Before moving forward, ethical procedures for the collection, sharing, and use of digital data need to be reviewed and updated, quantitative measures of feasibility and depression outcomes need to be standardised, and other methodological issues need to be rectified to increase the validity of results. Future research should then focus on (i) potential unintended outcomes of real-time monitoring; (ii) predictive investigations to determine which, if any, RMT data features precede and have sensitivity and specificity for depression relapse; (iii) use of RMT to inform and deliver digital micro-interventions and just-in-time adaptive interventions; (iv) impact of the use of RMT on time to

treat and depression outcomes in young people; and (v) implementation science to determine whether the significant challenges can be overcome.

**Recommendations for practice:** Without the above in place, the current best use of RMT for depression in young people is not as an intervention itself but as part of a blended, stepped-care approach, with use throughout the care pathway from opportunistic screening, watchful waiting, triage, and placement on waiting lists, to during treatment to monitor effectiveness, increase emotional self-awareness and enhance the therapeutic relationship.

### Acknowledgements

This work was funded by a Wellcome Trust Mental Health ‘Active Ingredients’ commission awarded to AW at KCL. We would like to thank The McPin Foundation and their Young People’s Network for their significant contributions to the project, manuscript, and dissemination. VM and AW are also supported by a MQ Brighter Futures grant [MQBF/1 IDEA], and VM by the National Institute for Health Research Biomedical Research Centre at South London and Maudsley NHS Foundation Trust and King’s College London (NIHR Maudsley BRC). The views expressed are those of the authors and not necessarily those of the Wellcome Trust, MQ, NHS, NIHR, Department of Health and Social Care, or King’s College London.

### Conflicts of Interest

AW receives funds from The McPin Foundation in her role as a lived experience panel member on an unrelated project. AvH developed the Electronic Behaviour Monitoring app (EBM version 2.0) as part of the StandStrong platform for passive sensing in maternal depression in low resource settings. GN, TS, MM, ZZ and VM declare no conflicts of interest.

### Abbreviations

EMA: ecological momentary assessment

LMICs: low-to-middle income countries

RMT: remote measurement technologies

YPN: Young People’s Network

### References

1. Solmi, M. *et al.* Age at onset of mental disorders worldwide: large-scale meta-analysis of 192 epidemiological studies. *Molecular Psychiatry* **27**, 281–295 (2021).
2. Kessler, R. C. *et al.* Lifetime prevalence and age-of-onset distributions of mental disorders in the World Health Organization’s World Mental Health Survey Initiative. *World Psychiatry* **6**, 168–176 (2007).
3. Yim, S. J. *et al.* The utility of smartphone-based, ecological momentary assessment for depressive symptoms. *Journal of Affective Disorders* **274**, 602–609 (2020).
4. Salaheddin, K. & Mason, B. Identifying barriers to mental health help-seeking among young adults in the UK: a cross-sectional survey. *British Journal of General Practice* **66**, e686–e692 (2016).



5. Houlders, J. W., Bortolotti, L. & Broome, M. R. Threats to epistemic agency in young people with unusual experiences and beliefs. *Synthese* **199**, 7689–7704 (2021).
6. Hetrick, S. E., Thompson, A., Yuen, K., Finch, S. & Parker, A. G. Is there a gap between recommended and “real world” practice in the management of depression in young people? A medical file audit of practice. *BMC Health Services Research* **12**, 178 (2012).
7. Hetrick, S., Simmons, M., Sanci, L. & Gunn, J. Primary care monitoring of depressive symptoms in young people. *Australian Family Physician* **43**, 147–150 (2014).
8. Weavers, B. *et al.* The antecedents and outcomes of persistent and remitting adolescent depressive symptom trajectories: a longitudinal, population-based English study. *The Lancet Psychiatry* **8**, 1053–1061 (2021).
9. Chisholm, D. *et al.* Scaling-up treatment of depression and anxiety: a global return on investment analysis. *The Lancet Psychiatry* **3**, 415–424 (2016).
10. Kieling, C. *et al.* Child and adolescent mental health worldwide: evidence for action. *The Lancet* **378**, 1515–1525 (2011).
11. Cipriani, A. *et al.* Comparative efficacy and tolerability of antidepressants for major depressive disorder in children and adolescents: A network meta-analysis. *The Lancet* **388**, 881–890 (2016).
12. Cuijpers, P., Cristea, I. A., Karyotaki, E., Reijnders, M. & Huibers, M. J. H. How effective are cognitive behavior therapies for major depression and anxiety disorders? A meta-analytic update of the evidence. *World Psychiatry* **15**, 245–258 (2016).
13. Sebastian, C. L., Pote, I. & Wolpert, M. Searching for active ingredients to combat youth anxiety and depression. *Nature Human Behaviour* **5**, 1266–1268 (2021).
14. Holmes, E. A. *et al.* The Lancet Psychiatry Commission on psychological treatments research in tomorrow’s science. *Lancet Psychiatry* **5**, 237–286 (2018).
15. Mullarkey, M. C. & Schleider, J. L. Embracing scientific humility and complexity: Learning “what works for whom” in youth psychotherapy research. *Journal of Clinical Child and Adolescent Psychology* **50**, 443–449 (2021).
16. Patel, V. *et al.* The Lancet Commission on global mental health and sustainable development. *The Lancet* **392**, 1553–1598 (2018).
17. Simblett, S. *et al.* Barriers to and facilitators of engagement with remote measurement technology for managing health: Systematic review and content analysis of findings. *Journal of Medical Internet Research* **20**, e10480–e10480 (2018).
18. Mohr, D. C., Zhang, M. & Schueller, S. M. Personal sensing: Understanding mental health using ubiquitous sensors and machine learning. *Annual Review of Clinical Psychology* **13**, 23–47 (2017).
19. Moshe, I. *et al.* Predicting symptoms of depression and anxiety using smartphone and wearable data. *Frontiers in Psychiatry* **12**, 625247 (2021).
20. Dogan, E., Sander, C., Wagner, X., Hegerl, U. & Kohls, E. Smartphone-based monitoring of objective and subjective data in affective disorders: Where are we and where are we going? Systematic review. *Journal of Medical Internet Research* **19**, e262–e262 (2017).
21. Rohani, D. A., Faurholt-Jepsen, M., Kessing, L. V. & Bardram, J. E. Correlations between objective behavioral features collected from mobile and wearable devices and depressive mood symptoms in patients with affective disorders: Systematic review. *JMIR Mhealth Uhealth* **6**, e165 (2018).
22. Simblett, S. *et al.* Barriers to and facilitators of engagement with mHealth technology for remote measurement and management of depression: Qualitative analysis. *JMIR Mhealth Uhealth* **7**, e11325–e11325 (2019).

23. van Genugten, C. R. *et al.* Experienced burden of and adherence to smartphone-based ecological momentary assessment in persons with affective disorders. *Journal of Clinical Medicine* **9**, 322 (2020).
24. Wu, E., Torous, J. & Harper, G. A gap in the literature: Clinical role for smartphone applications for depression care among adolescents? *J Am Acad Child Adolesc Psychiatry* **55**, 630–631 (2016).
25. Sequeira, L., Battaglia, M., Perrotta, S., Merikangas, K. & Strauss, J. Digital phenotyping with mobile and wearable devices: Advanced symptom measurement in child and adolescent depression. *J Am Acad Child Adolesc Psychiatry* **58**, 841–845 (2019).
26. Punukollu, M. & Marques, M. Use of mobile apps and technologies in child and adolescent mental health: a systematic review. *Evidence Based Mental Health* **22**, 161 (2019).
27. Sequeira, L. *et al.* Mobile and wearable technology for monitoring depressive symptoms in children and adolescents: A scoping review. *Journal of Affective Disorders* **265**, 314–324 (2020).
28. Dubad, M., Winsper, C., Meyer, C., Livanou, M. & Marwaha, S. A systematic review of the psychometric properties, usability and clinical impacts of mobile mood-monitoring applications in young people. *Psychological Medicine* **48**, 208–228 (2018).
29. Melcher, J., Hays, R. & Torous, J. Digital phenotyping for mental health of college students: a clinical review. *Evidence Based Mental Health* **23**, 161 (2020).
30. Lagan, S., Sandler, L. & Torous, J. Evaluating evaluation frameworks: a scoping review of frameworks for assessing health apps. *BMJ Open* **11**, e047001 (2021).
31. Wykes, T. & Schueller, S. Why reviewing apps is not enough: Transparency for Trust (T4T) principles of responsible health app marketplaces. *Journal of Medical Internet Research* **21**, e12390 (2019).
32. Wykes, T., Lipshitz, J. & Schueller, S. M. Towards the design of ethical standards related to digital mental health and all its applications. *Current Treatment Options in Psychiatry* **6**, 232–242 (2019).
33. World Economic Forum. Global governance toolkit for digital mental health: Building trust in disruptive technology for mental health. [https://www3.weforum.org/docs/WEF\\_Global\\_Governance\\_Toolkit\\_for\\_Digital\\_Mental\\_Health\\_2021.pdf](https://www3.weforum.org/docs/WEF_Global_Governance_Toolkit_for_Digital_Mental_Health_2021.pdf) (2021).
34. Rudd, B. N. & Beidas, R. S. Digital mental health: The answer to the global mental health crisis? *JMIR Mental Health* **7**, e18472–e18472 (2020).
35. Pawson, R., Greenhalgh, T., Harvey, G. & Walshe, K. Realist review - a new method of systematic review designed for complex policy interventions. *Journal of Health Services Research & Policy* **10**, 21–34 (2005).
36. Wilson, O. *et al.* A rapid evidence review of young people’s involvement in health research. *London: Wellcome* (2020).
37. Wong, G., Greenhalgh, T., Westhorp, G., Buckingham, J. & Pawson, R. RAMESES publication standards: realist syntheses. *BMC Medicine* **11**, 21 (2013).
38. World Health Organisation. Adolescence: a period needing special attention. <https://apps.who.int/adolescent/second-decade/section2> (2014).
39. United Nations Department of Economic and Social Affairs. *Definition of Youth*. <https://www.un.org/esa/socdev/documents/youth/fact-sheets/youth-definition.pdf> (2018).
40. Ospina-Pinillos, L. *et al.* Involving end users in adapting a Spanish version of a web-based mental health clinic for young people in Colombia: Exploratory study using participatory design methodologies. *JMIR Mental Health* **7**, e15914–e15914 (2020).

41. Sano, A. *et al.* Identifying objective physiological markers and modifiable behaviors for self-reported stress and mental health status using wearable sensors and mobile phones: Observational study. *Journal of Medical Internet Research* **20**, e210–e210 (2018).
42. Farhan, A. A. *et al.* Behavior vs. introspection: refining prediction of clinical depression via smartphone sensing data. in *2016 IEEE Wireless Health* 1–8 (IEEE, 2016). doi:10.1109/WH.2016.7764553.
43. Brannon, E. E., Cushing, C. C., Crick, C. J. & Mitchell, T. B. The promise of wearable sensors and ecological momentary assessment measures for dynamical systems modeling in adolescents: a feasibility and acceptability study. *Translational Behavioral Medicine* **6**, 558–565 (2016).
44. Wen, C. K. F., Schneider, S., Stone, A. A. & Spruijt-Metz, D. Compliance with mobile ecological momentary assessment protocols in children and adolescents: A systematic review and meta-analysis. *Journal of Medical Internet Research* **19**, e132–e132 (2017).
45. Chen, R. Y. *et al.* Phone-based interventions in adolescent psychiatry: A perspective and proof of concept pilot study with a focus on depression and autism. *JMIR Research Protocols* **6**, e114–e114 (2017).
46. Gatto, A. J., Miyazaki, Y. & Cooper, L. D. Help me help myself: examining an electronic mental health self-monitoring system in college students. *Higher Education* **83**, 163–182 (2020).
47. Müller, L. R. F., Gossmann, K., Schmid, R. F., Rosner, R. & Unterhitzberger, J. A pilot study on ecological momentary assessment in asylum-seeking children and adolescents resettled to Germany: Investigating compliance, post-migration factors, and the relation between daily mood, sleep patterns, and mental health. *PLoS One* **16**, e0246069–e0246069 (2021).
48. Fogg, B. J. A behavior model for persuasive design. in *Proceedings of the 4th International Conference on Persuasive Technology* (Association for Computing Machinery, 2009). doi:10.1145/1541948.1541999.
49. Caraban, A., Karapanos, E., Gonçalves, D. & Campos, P. 23 ways to nudge: A review of technology-mediated nudging in human-computer interaction. in *Proceedings of the 2019 CHI Conference on Human Factors in Computing Systems* 1–15 (Association for Computing Machinery, 2019). doi:10.1145/3290605.3300733.
50. Kenny, R., Dooley, B. & Fitzgerald, A. Ecological momentary assessment of adolescent problems, coping efficacy, and mood states using a mobile phone app: An exploratory study. *JMIR Mental Health* **3**, e51–e51 (2016).
51. Pavarini, G. *et al.* Data sharing in the age of predictive psychiatry: an adolescent perspective. *Evidence Based Mental Health* **25**, 69 (2022).
52. Rooksby, J., Morrison, A. & Murray-Rust, D. Student perspectives on digital phenotyping: The acceptability of using smartphone data to assess mental health. in *Proceedings of the 2019 CHI Conference on Human Factors in Computing Systems* 1–14 (Association for Computing Machinery, 2019). doi:10.1145/3290605.3300655.
53. Meter, D. J., Ehrenreich, S. E., Carker, C., Flynn, E. & Underwood, M. K. Older adolescents' understanding of participant rights in the BlackBerry Project, a longitudinal ambulatory assessment study. *Journal of Research on Adolescence* **29**, 662–674 (2019).
54. Wu, E., Torous, J., Hardaway, R. & Gutheil, T. Confidentiality and privacy for smartphone applications in child and adolescent psychiatry: Unmet needs and practical solutions. *Child and Adolescent Psychiatric Clinics of North America* **26**, 117–124 (2017).
55. Facca, D., Smith, M. J., Shelley, J., Lizotte, D. & Donelle, L. Exploring the ethical issues in research using digital data collection strategies with minors: A scoping review. *PLOS ONE* **15**, e0237875 (2020).

56. Cousins, J. C. *et al.* The bidirectional association between daytime affect and nighttime sleep in youth with anxiety and depression. *Journal of Pediatric Psychology* **36**, 969–979 (2011).
57. Keller, L. K., Grünewald, B., Vetter, C., Roenneberg, T. & Schulte-Körne, G. Not later, but longer: sleep, chronotype and light exposure in adolescents with remitted depression compared to healthy controls. *European Child and Adolescent Psychiatry* **26**, 1233–1244 (2017).
58. Wang, R. *et al.* Tracking depression dynamics in college students using mobile phone and wearable sensing. *Proceedings of the ACM on Interactive, Mobile, Wearable and Ubiquitous Technologies* **2**, 1–26 (2018).
59. Wang, R. *et al.* StudentLife: Assessing mental health, academic performance and behavioral trends of college students using smartphones. in *Proceedings of the 2014 ACM International Joint Conference on Pervasive and Ubiquitous Computing* 3–14 (Association for Computing Machinery, 2014). doi:10.1145/2632048.2632054.
60. Ben-Zeev, D., Scherer, E. A., Wang, R., Xie, H. & Campbell, A. T. Next-generation psychiatric assessment: Using smartphone sensors to monitor behavior and mental health. *Psychiatric Rehabilitation Journal* **38**, 218–226 (2015).
61. Kalmbach, D. A., Arnedt, J. T., Swanson, L. M., Rapier, J. L. & Ciesla, J. A. Reciprocal dynamics between self-rated sleep and symptoms of depression and anxiety in young adult women: a 14-day diary study. *Sleep Medicine* **33**, 6–12 (2017).
62. Peltz, J. S., Rogge, R. D., Connolly, H. & O'Connor, T. G. A process-oriented model linking adolescents' sleep hygiene and psychological functioning: the moderating role of school start times. *Sleep Health* **3**, 465–471 (2017).
63. Peltz, J. S., Rogge, R. D. & Connolly, H. Parents still matter: the influence of parental enforcement of bedtime on adolescents' depressive symptoms. *Sleep* **43**, (2020).
64. Nelson, B. W. *et al.* Concurrent and prospective associations between fitbit wearable-derived RDoC arousal and regulatory constructs and adolescent internalizing symptoms. *Journal of Child Psychology and Psychiatry* **63**, 282–295 (2021).
65. Melcher, J. *et al.* Digital phenotyping of student mental health during COVID-19: An observational study of 100 college students. *Journal of American College Health* 1–13 (2021) doi:10.1080/07448481.2021.1905650.
66. Boukhechba, M. *et al.* DemonicSalmon: Monitoring mental health and social interactions of college students using smartphones. *Smart Health* **9–10**, 192–203 (2018).
67. Knight, A. & Bidargaddi, N. Commonly available activity tracker apps and wearables as a mental health outcome indicator: A prospective observational cohort study among young adults with psychological distress. *Journal of Affective Disorders* **236**, 31–36 (2018).
68. Rodman, A. M. *et al.* A year in the social life of a teenager: Within-persons fluctuations in stress, phone communication, and anxiety and depression. *Clinical Psychological Science* **9**, 791–809 (2021).
69. Ahmed, Md. S., Rony, R. J., Hasan, T. & Ahmed, N. Smartphone usage behavior between depressed and non-depressed students: An exploratory study in the context of Bangladesh. in *Adjunct Proceedings of the 2020 ACM International Joint Conference on Pervasive and Ubiquitous Computing and Proceedings of the 2020 ACM International Symposium on Wearable Computers* 675–679 (Association for Computing Machinery, 2020). doi:10.1145/3410530.3414441.
70. Teresi, G. *et al.* Smartphone-based assessments of negative language use, central executive network coherence, and depression in adolescents. *Biological Psychiatry* **89**, S247 (2021).
71. Ding, Y., Chen, X., Fu, Q. & Zhong, S. A depression recognition method for college students using deep integrated support vector algorithm. *IEEE Access* **8**, 75616–75629 (2020).

72. Huckins, J. F. *et al.* Causal factors of anxiety and depression in college students: Longitudinal ecological momentary assessment and causal analysis using Peter and Clark Momentary Conditional Independence. *JMIR Mental Health* **7**, e16684 (2020).
73. Cao, J. *et al.* Tracking and predicting depressive symptoms of adolescents using smartphone-based self-reports, parental evaluations, and passive phone sensor data: Development and usability study. *JMIR Mental Health* **7**, e14045–e14045 (2020).
74. Jacobson, N. C. & Chung, Y. J. Passive sensing of prediction of moment-to-moment depressed mood among undergraduates with clinical levels of depression sample using smartphones. *Sensors* **20**, 3572 (2020).
75. Kidd, A. *et al.* Predictive modeling of mood changes for secondary prevention in youth depression. *J Am Acad Child Adolesc Psychiatry* **58**, S197 (2019).
76. Xu, X. *et al.* Leveraging routine behavior and contextually-filtered features for depression detection among college students. *Proceedings of the ACM on Interactive, Mobile, Wearable and Ubiquitous Technologies* **3**, 1–33 (2019).
77. Xu, X. *et al.* Leveraging collaborative-filtering for personalized behavior modeling: A case study of depression detection among college students. *Proceedings of the ACM on Interactive, Mobile, Wearable and Ubiquitous Technologies* **5**, 1–27 (2021).
78. Baldofski, S. *et al.* Efficacy and cost-effectiveness of two online interventions for children and adolescents at risk for depression (E.motion trial): study protocol for a randomized controlled trial within the ProHEAD consortium. *Trials* **20**, 53 (2019).
79. Espinosa, D. Pilot study of an internet-based program for prevention and early intervention of adolescent depression. <https://clinicaltrials.gov/ct2/show/NCT03047512> (2017).
80. Martínez-Nahuel, V. EMA baseline screening system for therapists who treat youths with depressive symptoms. <https://clinicaltrials.gov/ct2/show/NCT04830527> (2021).
81. Greet, C., Geert, C. & DeSmet, A. Effect of #LIFEGOALS on adolescents' mental health (MOV-E-STAR). <https://clinicaltrials.gov/ct2/show/NCT04719858> (2021).
82. Kaess, M. *et al.* Promoting Help-seeking using E-technology for ADolescents with mental health problems: Study protocol for a randomized controlled trial within the ProHEAD Consortium. *Trials* **20**, 94 (2019).
83. Kaess, M. & Bauer, S. Promoting Help-seeking using E-technology for ADolescents: The ProHEAD Consortium. *Trials* **20**, 72 (2019).
84. Newbold, A. *et al.* Promotion of mental health in young adults via mobile phone app: Study protocol of the ECoWeB (emotional competence for well-being in young adults) cohort multiple randomised trials. *BMC Psychiatry* **20**, 458 (2020).
85. Watkins, E. App-based mental health promotion in young European adults (ECoWeB). <https://www.clinicaltrials.gov/ct2/show/NCT04148508> (2019).
86. Byrne, S. *et al.* Integrating a mobile health device into a community youth mental health team to manage severe mental illness: Protocol for a randomized controlled trial. *JMIR Research Protocols* **9**, e19510–e19510 (2020).
87. Stikkelbroek, Y. StayFine RCT: app-based anxiety and depression relapse prevention in adolescents. <https://www.trialregister.nl/trial/8237> (2019).
88. Hickie, I. B. *et al.* Project Synergy: co-designing technology-enabled solutions for Australian mental health services reform. *Medical Journal of Australia* **211**, S3–S39 (2019).
89. Iorfino, F. *et al.* A digital platform designed for youth mental health services to deliver personalized and measurement-based care. *Frontiers in Psychiatry* **10**, 595 (2019).

90. Davenport, T. A. *et al.* Validation of the InnoWell Platform: Protocol for a clinical trial. *JMIR Research Protocols* **8**, e13955 (2019).
91. Hickie, I. Project Synergy: A clinical trial to validate the Synergy Online System within Australian mental health services across the lifespan. <https://www.anzctr.org.au/Trial/Registration/TrialReview.aspx?id=374632> (2018).
92. Yunusova, A. *et al.* Assessing the mental health of emerging adults through a mental health app: Protocol for a prospective pilot study. *JMIR Research Protocols* **10**, e25775–e25775 (2021).
93. Schleider, J. Harnessing network science to personalize scalable interventions for adolescent depression (TRACK to TREAT Phase 2). <https://clinicaltrials.gov/ct2/show/NCT04607902> (2020).
94. Jenness, J. Activating and Connecting Teens (ACT) study. <https://clinicaltrials.gov/ct2/show/NCT03438656> (2018).
95. Mohr, D. Digital mental health service for non-treatment seeking young adults. <https://clinicaltrials.gov/ct2/show/NCT04948268> (2021).
96. Espinosa, D. An internet-based program for prevention and early intervention of adolescent depression. <https://clinicaltrials.gov/ct2/show/NCT02780232> (2016).
97. Ospina-Pinillos, L. *et al.* Developing a Mental Health eClinic to improve access to and quality of mental health care for young people: Using participatory design as research methodologies. *Journal of Medical Internet Research* **20**, e188–e188 (2018).
98. Goodyear-Smith, F. *et al.* Screening for risky behaviour and mental health in young people: the YouthCHAT programme. *Public Health Reviews* **38**, 20 (2017).
99. Thabrew, H. *et al.* Comparison of YouthCHAT, an electronic composite psychosocial screener, with a clinician interview assessment for young people: randomized controlled trial. *Journal of Medical Internet Research* **21**, e13911–e13911 (2019).
100. Syafei, W. A. *et al.* SMILE (Self-Monitoring Interactive Learning Evaluation) for Indonesian University Students. in *2019 International Biomedical Instrumentation and Technology Conference* vol. 1 12–16 (IEEE, 2019).
101. Forchuk, C. *et al.* The Youth-Mental Health Engagement Network: An exploratory pilot study of a smartphone and computer-based personal health record for youth experiencing depressive symptoms. *International Journal of Mental Health* **45**, 205–222 (2016).
102. Kenny, R., Dooley, B. & Fitzgerald, A. Feasibility of “CopeSmart”: A telemental health app for adolescents. *JMIR Mental Health* **2**, e22–e22 (2015).
103. Kajitani, K. *et al.* Short-term effect of a smartphone application on the mental health of university students: A pilot study using a user-centered design self-monitoring application for mental health. *PLOS ONE* **15**, e0239592 (2020).
104. Reid, S. C. *et al.* A mobile phone application for the assessment and management of youth mental health problems in primary care: a randomised controlled trial. *BMC Family Practice* **12**, 131 (2011).
105. King, C. A. *et al.* Online suicide risk screening and intervention with college students: a pilot randomized controlled trial. *Journal of Consulting and Clinical Psychology* **83**, 630–636 (2015).
106. Reid, S. *et al.* Using a mobile phone application in youth mental health: An evaluation study. *Australian Family Physician* **41**, 711–714 (2012).
107. Kauer, S. D. *et al.* Self-monitoring using mobile phones in the early stages of adolescent depression: randomized controlled trial. *Journal of Medical Internet Research* **14**, e67–e67 (2012).

108. Reid, S. C. *et al.* A mobile phone application for the assessment and management of youth mental health problems in primary care: health service outcomes from a randomised controlled trial of mobiletype. *BMC Family Practice* **14**, 84 (2013).
109. Jensen-Doss, A. *et al.* Community Study of Outcome Monitoring for Emotional Disorders in Teens (COMET): A comparative effectiveness trial of a transdiagnostic treatment and a measurement feedback system. *Contemporary Clinical Trials* **74**, 18–24 (2018).
110. Glover, A. C. *et al.* Automated mobile phone-based mental health resource for homeless youth: Pilot study assessing feasibility and acceptability. *JMIR Mental Health* **6**, e15144–e15144 (2019).
111. Schueller, S. M. *et al.* A mobile phone-based intervention to improve mental health among homeless young adults: Pilot feasibility trial. *JMIR Mhealth Uhealth* **7**, e12347–e12347 (2019).
112. Nguyen-Feng, V. N., Romano, F. N. & Frazier, P. Emotional abuse moderates efficacy of an ecological momentary stress management intervention for college students. *Journal of Counseling Psychology* **66**, 461–472 (2019).
113. Baumel, A., Fleming, T. & Schueller, S. M. Digital micro-interventions for behavioral and mental health gains: Core components and conceptualization of digital micro intervention care. *Journal of Medical Internet Research* **22**, e20631–e20631 (2020).
114. Ranney, M. L. *et al.* Acceptability, language, and structure of text message-based behavioral interventions for high-risk adolescent females: a qualitative study. *The Journal of Adolescent Health* **55**, 33–40 (2014).
115. Matthews, M. & Doherty, G. J. In the mood: engaging teenagers in psychotherapy using mobile phones. in *Proceedings of the SIGCHI Conference on Human Factors in Computing Systems* 2947–2956 (Association for Computing Machinery, 2011). doi:10.1145/1978942.1979379.
116. Beames, J. R., Kikas, K. & Werner-Seidler, A. Prevention and early intervention of depression in young people: an integrated narrative review of affective awareness and Ecological Momentary Assessment. *BMC Psychology* **9**, 113 (2021).
117. Daros, A. R. *et al.* A meta-analysis of emotional regulation outcomes in psychological interventions for youth with depression and anxiety. *Nature Human Behaviour* **5**, 1443–1457 (2021).
118. Pote, I., Sebastian, C. & Wolpert, M. *What science has shown can help young people with anxiety and depression: Identifying and reviewing the “active ingredients of effective interventions.”* <https://cms.wellcome.org/sites/default/files/2021-10/What-science-has-shown-can-help-young-people-with-anxiety-and-depression.pdf> (2021).
119. Christensen, H., Reynolds, J. & Griffiths, K. M. The use of e-health applications for anxiety and depression in young people: challenges and solutions. *Early Intervention in Psychiatry* **5**, 58–62 (2011).
120. Hetrick, S. E. *et al.* Comprehensive online self-monitoring to support clinicians manage risk of suicide in youth depression. *Crisis* **38**, 147–157 (2016).
121. Teixeira, A. & Freire, T. From therapy to daily life of a depressed adolescent: Crossing psychopathology and optimal functioning. *Current Psychology* **39**, 155–166 (2020).
122. Dewa, L. H. *et al.* Young adults’ perceptions of using wearables, social media and other technologies to detect worsening mental health: A qualitative study. *PLoS One* **14**, e0222655–e0222655 (2019).
123. Duvenage, M. *et al.* Technology can sting when reality bites: Adolescents’ frequent online coping is ineffective with momentary stress. *Computers in Human Behavior* **102**, 248–259 (2020).

124. Kanstrup, A. M., Bertelsen, P. & Jensen, M. B. Contradictions in digital health engagement: An activity tracker's ambiguous influence on vulnerable young adults' engagement in own health. *Digital Health* **4**, (2018).
125. Axelson, D. A. *et al.* Measuring mood and complex behavior in natural environments: Use of ecological momentary assessment in pediatric affective disorders. *Journal of Child and Adolescent Psychopharmacology* **13**, 253–266 (2003).
126. Kenny, R., Dooley, B. & Fitzgerald, A. Developing mental health mobile apps: Exploring adolescents' perspectives. *Health Informatics Journal* **22**, 265–275 (2014).
127. Hetrick, S., Dellosa, M. K., Simmons, M. B. & Phillips, L. Development and pilot testing of an online monitoring tool of depression symptoms and side effects for young people being treated for depression. *Early Intervention in Psychiatry* **9**, 66–69 (2015).
128. Hetrick, S. *et al.* Youth codesign of a mobile phone app to facilitate self-monitoring and management of mood symptoms in young people with major depression, suicidal ideation, and self-harm. *JMIR Mental Health* **5**, e9–e9 (2018).
129. Grist, R., Cliffe, B., Denne, M., Croker, A. & Stallard, P. An online survey of young adolescent girls' use of the internet and smartphone apps for mental health support. *BJPsych Open* **4**, 302–306 (2018).
130. Marques, G., Drissi, N., Díez, I. de la T., de Abajo, B. S. & Ouhbi, S. Impact of COVID-19 on the psychological health of university students in Spain and their attitudes toward mobile mental health solutions. *International Journal of Medical Informatics* **147**, 104369 (2021).
131. Duvenage, M. *et al.* Ambulatory assessment of adolescent coping: It's a complicated process. *Journal of Research on Adolescence* **29**, 578–594 (2019).
132. Bakker, D. & Rickard, N. Engagement in mobile phone app for self-monitoring of emotional wellbeing predicts changes in mental health: MoodPrism. *Journal of Affective Disorders* **227**, 432–442 (2018).
133. Robotham, D., Satkunanathan, S., Doughty, L. & Wykes, T. Do we still have a digital divide in mental health? A five-year survey follow-up. *Journal of Medical Internet Research* **18**, e309–e309 (2016).
134. Naslund, J. A. *et al.* Digital technology for treating and preventing mental disorders in low-income and middle-income countries: a narrative review of the literature. *Lancet Psychiatry* **4**, 486–500 (2017).
135. Spanakis, P., Peckham, E., Mathers, A., Shiers, D. & Gilbody, S. The digital divide: amplifying health inequalities for people with severe mental illness in the time of COVID-19. *The British Journal of Psychiatry* **219**, 529–531 (2021).
136. Poudyal, A. *et al.* Wearable digital sensors to identify risks of postpartum depression and personalize psychological treatment for adolescent mothers: Protocol for a mixed methods exploratory study in rural Nepal. *JMIR Research Protocols* **8**, e14734–e14734 (2019).
137. Maharjan, S. M. *et al.* Passive sensing on mobile devices to improve mental health services with adolescent and young mothers in low-resource settings: the role of families in feasibility and acceptability. *BMC Medical Informatics and Decision Making* **21**, 117 (2021).
138. Kohrt, B. A. *et al.* Procedures to select digital sensing technologies for passive data collection with children and their caregivers: Qualitative cultural assessment in South Africa and Nepal. *JMIR Pediatrics and Parenting* **2**, e12366 (2019).
139. Lund, C. *et al.* Social determinants of mental disorders and the Sustainable Development Goals: a systematic review of reviews. *The Lancet Psychiatry* **5**, 357–369 (2018).
140. Viduani, A. *et al.* Social isolation as a core feature of adolescent depression: a qualitative study in Porto Alegre, Brazil. *International Journal of Qualitative Studies on Health and Well-being* **16**, 1978374 (2021).



141. Verduin, T. L. Development of an integrated clinical informatics system to support a unified system of care for adolescent depression. *J Am Acad Child Adolesc Psychiatry* **57**, S13 (2018).
142. Morris, A. C. *et al.* Moving from development to implementation of digital innovations within the NHS: myHealthE, a remote monitoring system for tracking patient outcomes in child and adolescent mental health services. *medRxiv* (2021) doi:10.1101/2021.06.09.21257998.
143. Kurki, M., Koivunen, M., Anttila, M., Hätönen, H. & Välimäki, M. Usefulness of Internet in adolescent mental health outpatient care. *Journal of Psychiatric and Mental Health Nursing* **18**, 265–273 (2011).
144. Adrian, M. *et al.* Implementation determinants and outcomes of a technology-enabled service targeting suicide risk in high schools: Mixed methods study. *JMIR Mental Health* **7**, e16338–e16338 (2020).
145. Grant, C., Widnall, E., Cross, L., Simonoff, E. & Downs, J. Informing the development of an E-platform for monitoring wellbeing in schools: involving young people in a co-design process. *Research Involvement and Engagement* **6**, 51 (2020).
146. Gehring, N. D. *et al.* Pediatric eMental healthcare technologies: a systematic review of implementation foci in research studies, and government and organizational documents. *Implementation Science* **12**, 76 (2017).
147. Barnett, I., Torous, J., Reeder, H. T., Baker, J. & Onnela, J.-P. Determining sample size and length of follow-up for smartphone-based digital phenotyping studies. *Journal of the American Medical Informatics Association* **27**, 1844–1849 (2020).
148. Fleisher, W. P. & Katz, L. Y. Early onset major depressive disorder. *Paediatrics and Child Health* **6**, 444–448 (2001).
149. Lewinsohn, P. M., Clarke, G. N., Seeley, J. R. & Rohde, P. Major depression in community adolescents: Age at onset, episode duration, and time to recurrence. *J Am Acad Child Adolesc Psychiatry* **33**, 809–818 (1994).
150. Rao, U. & Chen, L.-A. Characteristics, correlates, and outcomes of childhood and adolescent depressive disorders. *Dialogues in Clinical Neuroscience* **11**, 45–62 (2009).
